# Supplementary material for: Development of charge carrier-selective heterodyne transient grating spectroscopic technique and its application in the distinction of surface trap states in hematite
Source: Royal Society of Chemistry journal article supplement (doi:10.1039/d3cp00744h), 2023-01-01
Supplement: d3cp00744h1.pdf [file d3cp00744h1.pdf]

# Supporting Information (SI)

## Development of Charge Carrier-Selective Heterodyne Transient Grating Spectroscopic Technique and Its Application in the Distinction of the Surface Trap States in Hematite

*Young Hyun Kim, Yu Gyeong Bae, and Woon Yong Sohn\**

Department of Chemistry, Chungbuk National University, Chungdae-ro 1, Cheongju, Chungbuk  
28644, Korea

**\*Corresponding Author**

W. Y. Sohn, Phone: 82-43-261-2285, E-mail: [nunyong@chungbuk.ac.kr](mailto:nunyong@chungbuk.ac.kr)

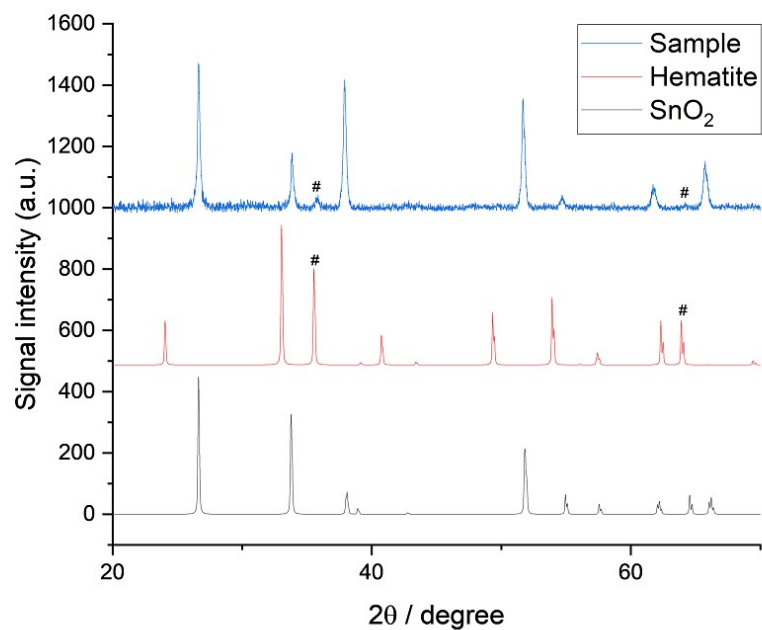

**Figure S1** X-ray diffraction (XRD) patterns of the hematite film (blue) with the reference patterns of hematite (red) and SnO<sub>2</sub> (black)

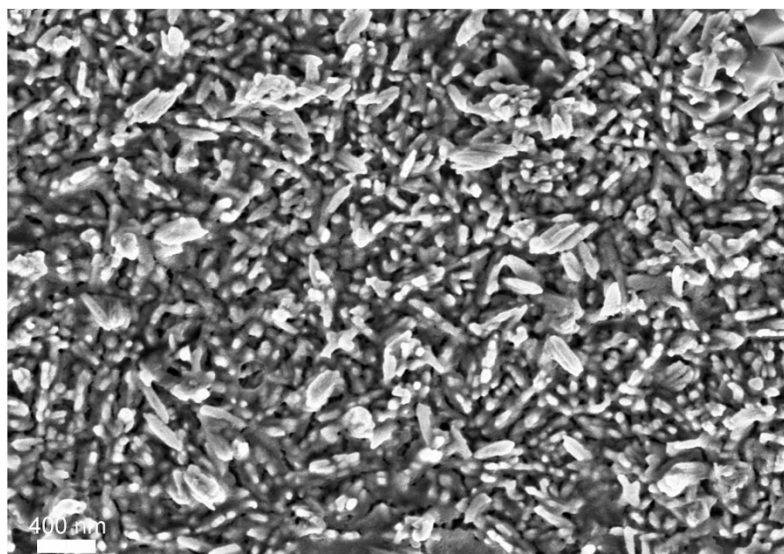

**Figure S2** Scanning electron microscopy (SEM) image of the hematite film

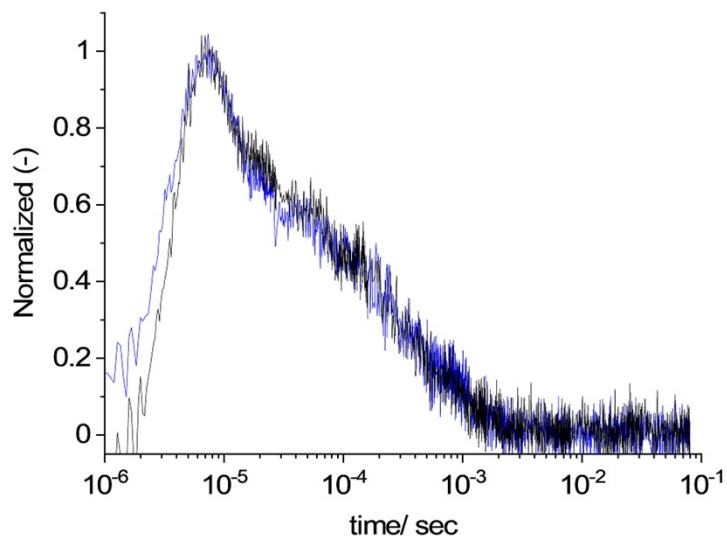

**Figure S3** HD-TG responses of the hematite film with (blue) and without (black) the burn laser (830 nm)

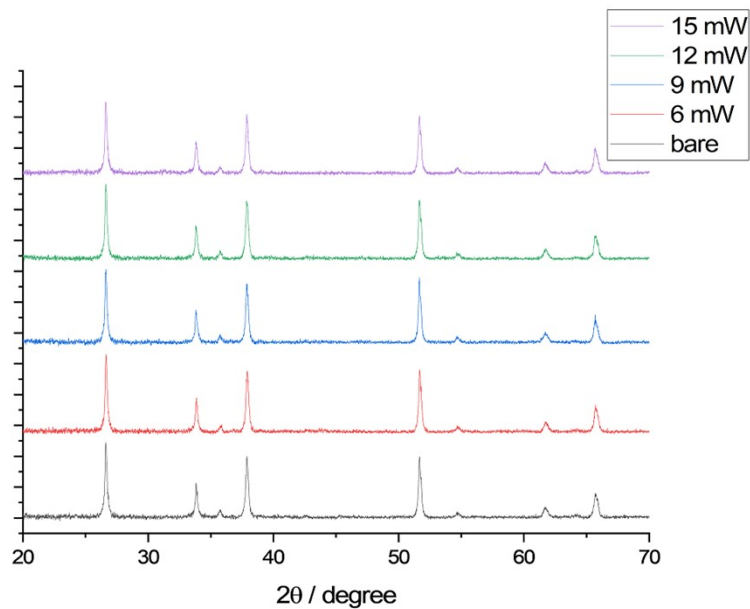

**Figure S4** X-ray diffraction (XRD) patterns of the hematite film, observed after the irradiations of the pump, probe and burn lasers. The pump light intensities were varied. The lasers were irradiated on the sample for 1 hour for each measurement. Even under the high pump laser pulse intensity (1.5 mJ), the crystal structure of hematite was not changed and any peaks originating from the decomposition were not observed.
